# Supplementary material for: Test-to-Stay After Exposure to SARS-CoV-2 in K–12 Schools
Source: Oxford University Press journal article supplement (doi:10.1542/peds.2021-056045), 2022-04-19
Supplement: peds_2021056045supplementarydata.pdf [file peds_2021056045supplementarydata.pdf]

## Supplemental Information

**SUPPLEMENTAL TABLE 4** Demographics for Participating Districts and SARS-CoV-2 Positivity Rate

|                | American<br>Indian or<br>Alaska<br>Native, <i>n</i> (%) | Asian<br>American,<br><i>n</i> (%) | Black or<br>African<br>American,<br><i>n</i> (%) | Hispanic, <sup>a</sup><br><i>n</i> (%) | Multiple, <i>n</i> (%) | Native<br>Hawaiian or<br>Other Pacific<br>Islander,<br><i>n</i> (%) | White, <i>n</i> (%) | Total  | SARS-CoV-2<br>Test<br>Positivity<br>Rate During<br>the Study<br>Period. <sup>b</sup><br>95% CI |
|----------------|---------------------------------------------------------|------------------------------------|--------------------------------------------------|----------------------------------------|------------------------|---------------------------------------------------------------------|---------------------|--------|------------------------------------------------------------------------------------------------|
| District 1     | 0                                                       | 0                                  | 0                                                | 0                                      | 0                      | 0                                                                   | 31 (100)            | 31     |                                                                                                |
| District total | 3 (0)                                                   | 12 (0)                             | 15 (1)                                           | 367 (13)                               | 48 (2)                 | 0 (0)                                                               | 2383 (84)           | 2828   | 5.15–16.95                                                                                     |
| District 2     | 0                                                       | 0                                  | 6 (10.3)                                         | 4 (6.9)                                | 2 (3.5)                | 0                                                                   | 46 (79.3)           | 58     |                                                                                                |
| District total | 1 (0)                                                   | 28 (2)                             | 124 (8)                                          | 369 (22)                               | 84 (5)                 | 0 (0)                                                               | 1036 (63)           | 1642   | 5.98–12.49                                                                                     |
| District 3     | 0                                                       | 0                                  | 0                                                | 0                                      | 0                      | 0                                                                   | 1 (100)             | 1      |                                                                                                |
| District total | 0 (0)                                                   | 37 (16)                            | 18 (8)                                           | 25 (11)                                | 18 (8)                 | 0 (0)                                                               | 128 (57)            | 226    | 5.34–8.02                                                                                      |
| District 4     | 2 (1.5)                                                 | 3 (2.2)                            | 22 (16.3)                                        | 0                                      | 4 (3.0)                | 0                                                                   | 104 (77.0)          | 135    |                                                                                                |
| District total | 98 (0)                                                  | 283 (1)                            | 5819 (16)                                        | 9778 (27)                              | 1862 (5)               | 21 (0)                                                              | 18 251 (51)         | 36 112 | 4.27–8.86                                                                                      |
| District 5     | 0                                                       | 0                                  | 1 (9.1)                                          | 0                                      | 1 (9.1)                | 0                                                                   | 9 (81.8)            | 11     |                                                                                                |
| District total | 0 (0)                                                   | 0 (0)                              | 332 (34)                                         | 118 (12)                               | 61 (6)                 | 0 (0)                                                               | 452 (47)            | 963    | 1.82–10.36                                                                                     |
| District 6     | 0                                                       | 4 (3.1)                            | 27 (20.9)                                        | 0                                      | 2 (1.6)                | 2 (1.6)                                                             | 94 (72.9)           | 129    |                                                                                                |
| District total | 51 (0)                                                  | 447 (2)                            | 6839 (23)                                        | 4676 (16)                              | 1593 (5)               | 31 (0)                                                              | 15 853 (54)         | 29 490 | 5.23–12.98                                                                                     |
| Total          | 2                                                       | 7                                  | 56                                               | 4                                      | 9                      | 2                                                                   | 285                 | 365    |                                                                                                |

<sup>a</sup>Hispanic is collected as part of race in district total numbers.

<sup>b</sup>Data: <https://data.cdc.gov/Public-Health-Surveillance/United-States-COVID-19-County-Level-of-Community>.
